# Supplementary material for: Population Genetics of Streptococcus dysgalactiae Subspecies equisimilis Reveals Widely Dispersed Clones and Extensive Recombination
Source: PubMed Central journal article supplement (PMC2909212; doi:10.1371/journal.pone.0011741), 2010-07-23
Supplement: pone.0011741.s002.pdf [file pone.0011741.s002.pdf]

**Table S2.** PCR primer pairs used for MLST in the study.

| Locus       | Forward primer | Forward primer sequence (5' to 3')    | Reverse primer | Reverse primer sequence (5' to 3') | Nucleotide location in GGS_124 <sup>a</sup> | Primers used by <sup>b</sup> |
|-------------|----------------|---------------------------------------|----------------|------------------------------------|---------------------------------------------|------------------------------|
| <i>gki</i>  | Gkigc-up       | GGAATTGGTATGGGATCACCAGGAGC            | Gkigc-dn       | AATTCTCCTGCTGCTGACAC               | 1473922-1473425                             | UL, NYMC, QIMR               |
| <i>gtr</i>  | Gtrgc-up       | GCACAAGTATTATGGGCACA                  | Gtrgc-dn       | CACGGTCTGCGACTTC                   | 1450465-1450016                             | UL, QIMR                     |
|             | Gtrgc-up2      | AAATATTATGGGCAAAACGAGGTG              | Gtrgc-dn2      | CTTCCACAATAACGCCGCCATCCATA         |                                             | NYMC                         |
| <i>murl</i> | Murlgc-up      | GACCTGCTGAGCAAATTAGAGAATACA<br>CATGGG | Murlgc-dn      | CAGGACTTGCCGTTGTGTA AAAATGGTG      | 389637-390074                               | UL, NYMC                     |
|             | Murlgc-up2     | TGCTGACTCAAAATGTAAAATGATTG            | Murlgc-dn2     | GATGATAATTCACCGTTAATGTCAAAATAG     |                                             | QIMR                         |
| <i>mutS</i> | MutSgc-up      | GAAGAGTCATCTAGTTTAGAATACGAT           | MutSgc-dn      | AGAGAGTTGTCACTTGCGCGTTTGATTGCT     | 2031544-2031140                             | UL, NYMC, QIMR               |
| <i>recP</i> | RecPgc-up      | GCAAATTCTGGACACCCAGG                  | RecPgc-dn      | CTTTCACAAGGATATGTTGCC              | 1668713-1668255                             | UL, NYMC, QIMR               |
| <i>xpt</i>  | Xptgc-up       | TTACTTGAAGAACGCATCTTA                 | Xptgc-dn       | ATGAGGTCACTTCAATGCC                | 882848-883297                               | UL, NYMC, QIMR               |
| <i>atoB</i> | AtoBgc-up      | ACGTTGCTCAGAAATATGGCAT                | AtoBgc-dn      | AAAGTGTGCTAGTCCTCTGGTTAC           | 1634373-1634806                             | UL, NYMC, QIMR               |

<sup>a</sup> Based on nucleotide position in the GGS\_124 genome (GenBank number AP010935).

<sup>b</sup> UL, University of Lisbon; NYMC, New York Medical College; QIMR, Queensland Institute of Medical Research.
