# Supplementary material for: Population Genetics of Streptococcus dysgalactiae Subspecies equisimilis Reveals Widely Dispersed Clones and Extensive Recombination
Source: PubMed Central journal article supplement (PMC2909212; doi:10.1371/journal.pone.0011741), 2010-07-23

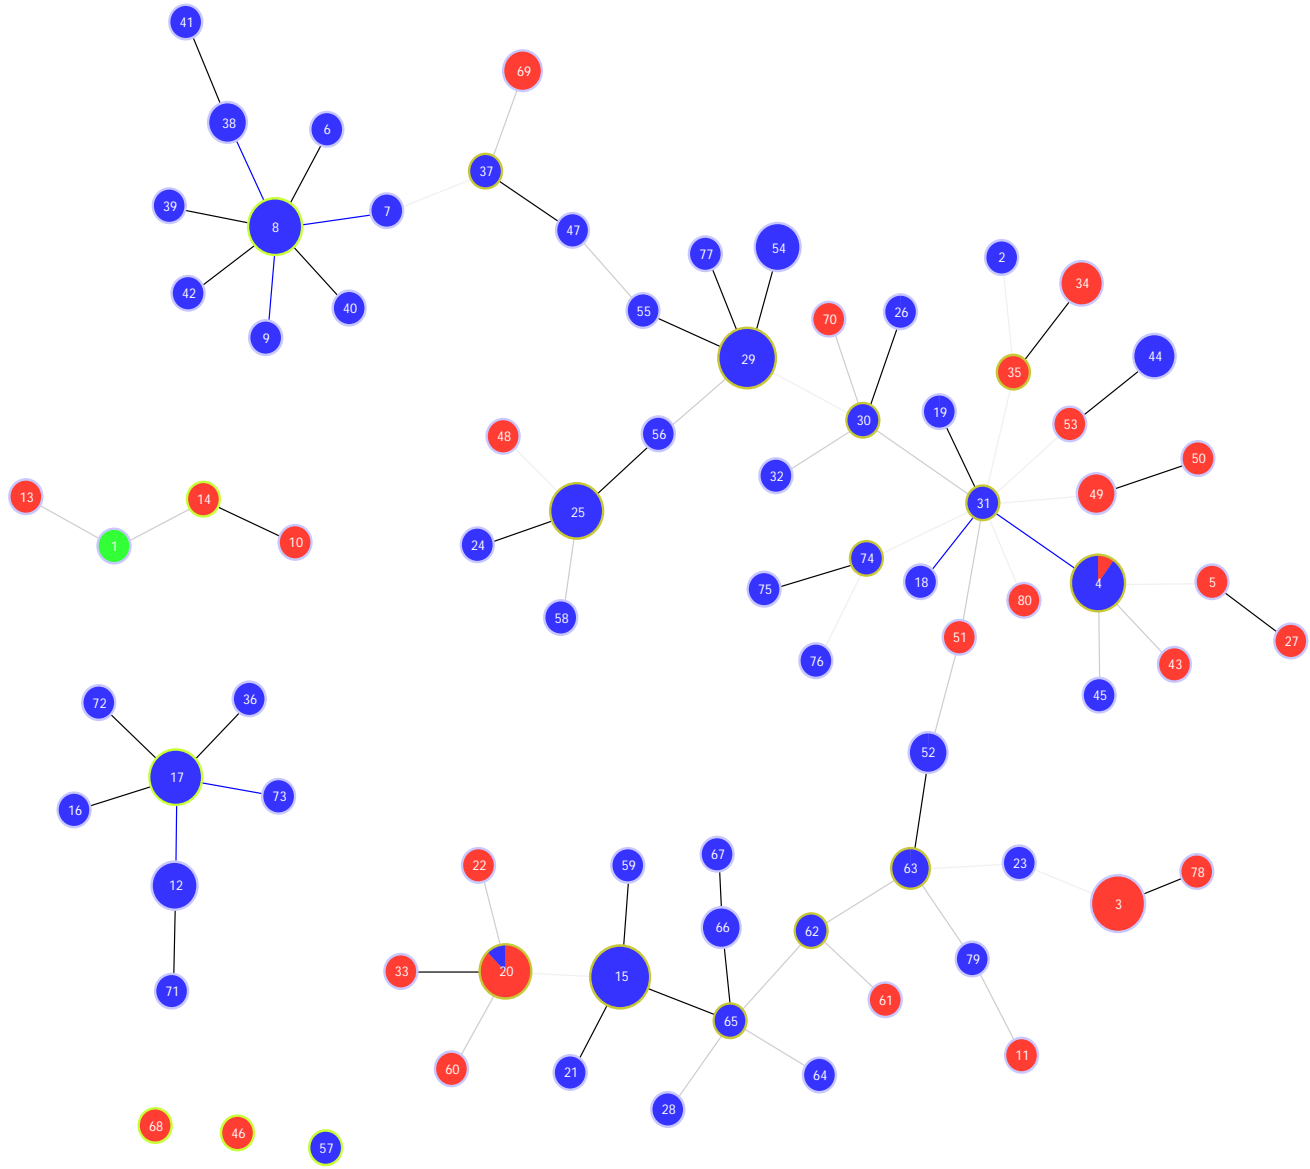

Supplement: pone.0011741.s005.pdf [file pone.0011741.s005.pdf]
