# Supplementary material for: Population Genetics of Streptococcus dysgalactiae Subspecies equisimilis Reveals Widely Dispersed Clones and Extensive Recombination
Source: PubMed Central journal article supplement (PMC2909212; doi:10.1371/journal.pone.0011741), 2010-07-23
Supplement: pone.0011741.s006.pdf [file pone.0011741.s006.pdf]

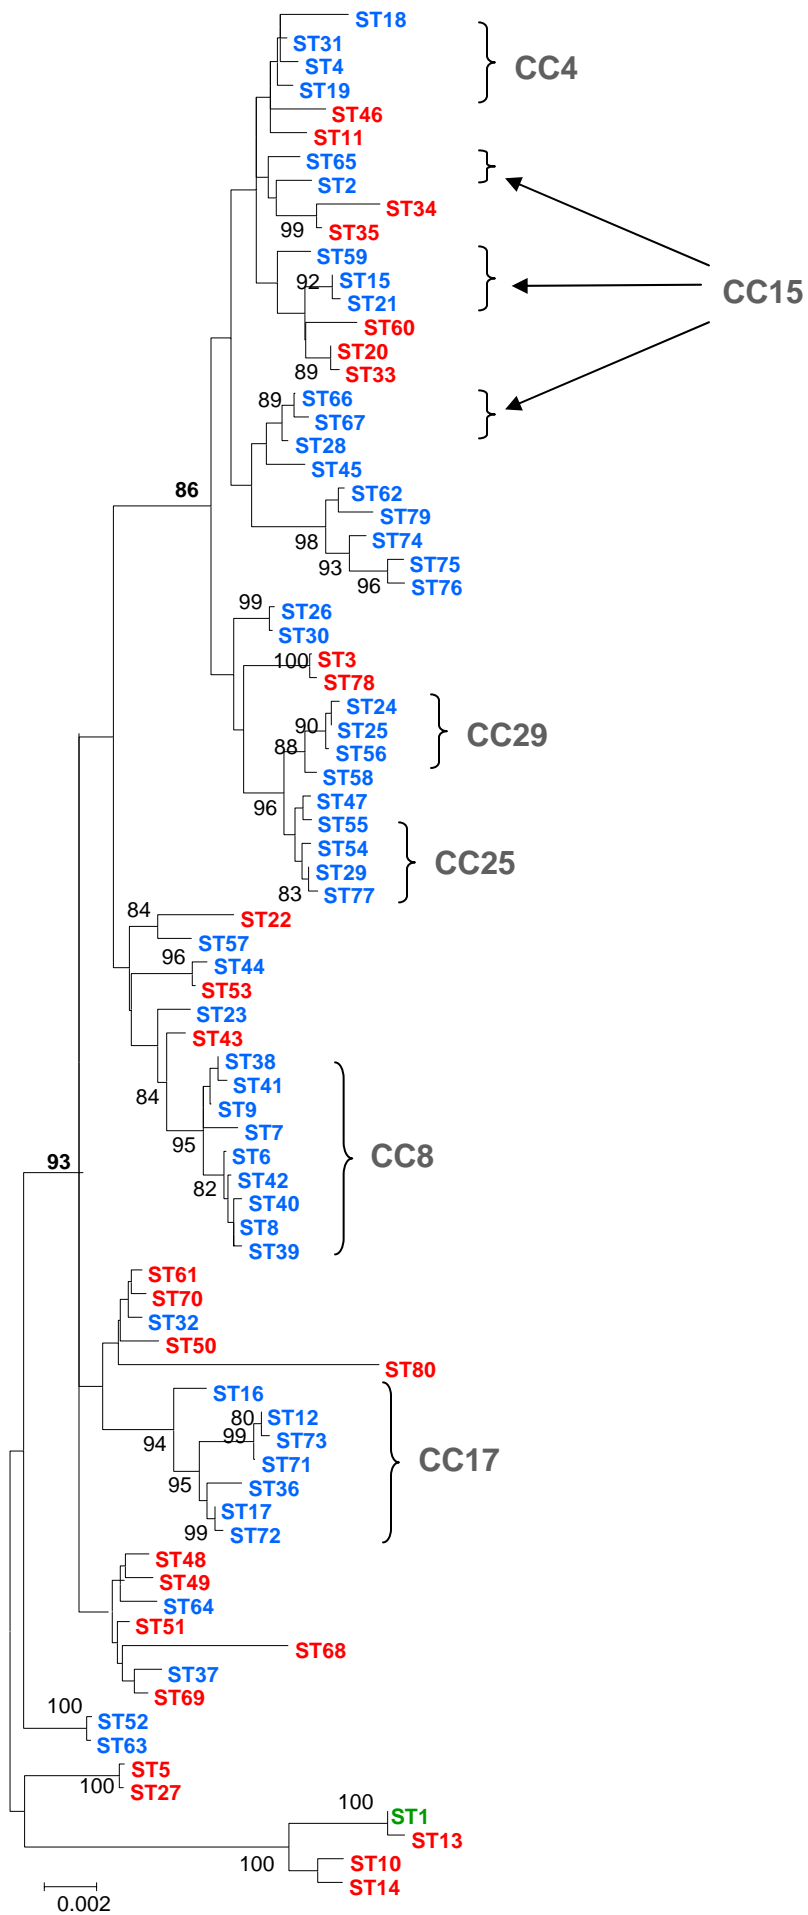

|         |
|---------|
| Group C |
| Group G |
| Group L |
